# Supplementary material for: Simultaneous determination of 8-oxo-2’-deoxyguanosine and 8-oxo-2’-deoxyadenosine in human retinal DNA by liquid chromatography nanoelectrospray-tandem mass spectrometry
Source: PubMed Central journal article supplement (PMC4793187; doi:10.1038/srep22375), 2016-03-16
Supplement: srep22375-s1.pdf [file srep22375-s1.pdf]

## Supporting Information

### **Simultaneous determination of 8-oxo-2'-deoxyguanosine and 8-oxo-2'-deoxyadenosine in human retinal DNA by liquid chromatography nanoelectrospray-tandem mass spectrometry**

Bin Ma,<sup>†</sup> Meng Jing,<sup>†</sup> Peter W. Villalta,<sup>†</sup> Rebecca J. Kappahn,<sup>§</sup> Sandra R. Montezuma,<sup>§</sup> Deborah A. Ferrington,<sup>§</sup> and Irina Stepanov\*,<sup>†, ‡</sup>

<sup>†</sup>Masonic Cancer Center, <sup>§</sup>Department of Ophthalmology and Visual Neurosciences, and <sup>‡</sup>Division of Environmental Health Sciences, University of Minnesota, Mayo Mail Code 806, 420 Delaware Street SE, Minneapolis, Minnesota 55455, United States

Corresponding Author:

\*Phone: (612) 624-4998. Fax: (612) 626-5135. E-mail: [stepa011@umn.edu](mailto:stepa011@umn.edu).

## Table of Contents

|           |                                                                                                                                                       |   |
|-----------|-------------------------------------------------------------------------------------------------------------------------------------------------------|---|
| Figure S1 | Chromatograms obtained upon analysis of possible artifactual 8-oxo-dG production during the sample preparation                                        | 3 |
| Figure S2 | Chromatogram of a standard mixture of deoxyuridine, dG, thymidine, 8-oxo-dG, M <sub>1</sub> dG and 8-oxo-dA during column chromatography purification | 4 |
| Figure S3 | Typical chromatograms obtained upon analysis of dG in standard solution and mitochondrial DNA from one donor's retina.                                | 5 |

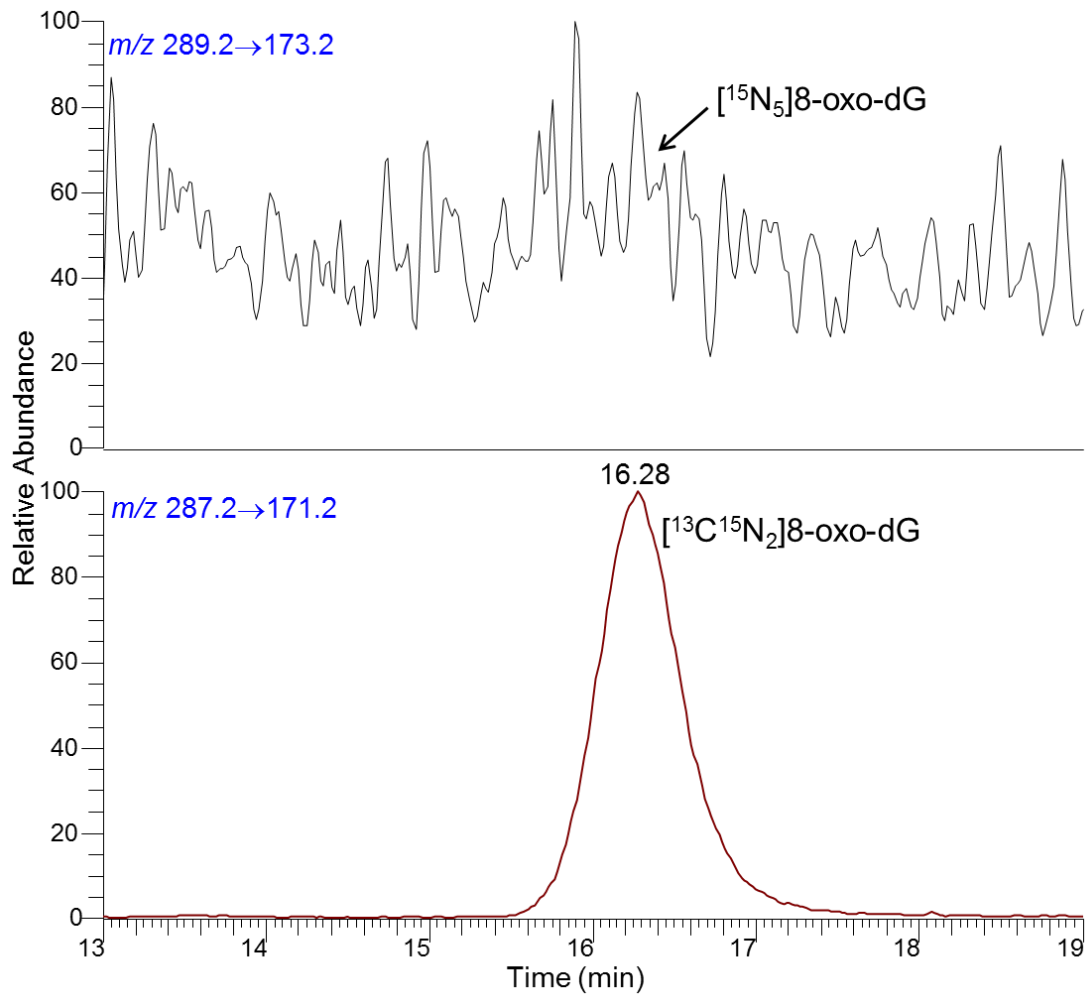

Figure S1. Chromatograms obtained upon analysis of possible artifactual 8-oxo-dG production during the sample preparation.  $[^{15}\text{N}_5]\text{8-oxo-dG}$  was not detected.

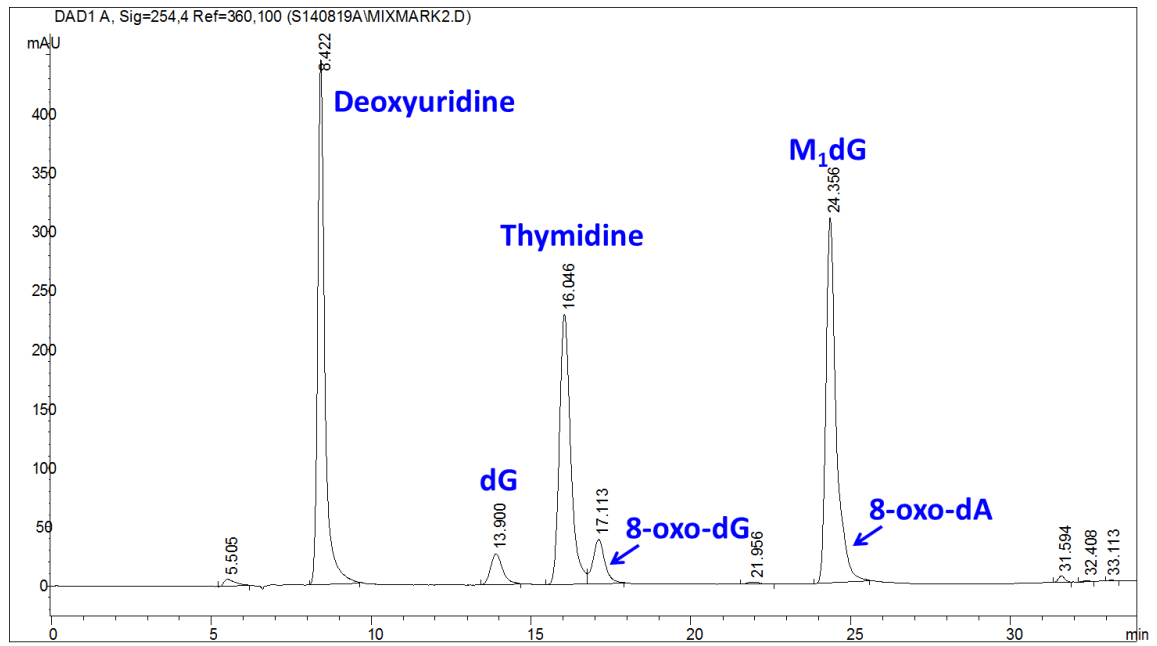

Figure S2. Chromatogram of a standard mixture of deoxyuridine, dG, thymidine, 8-oxo-dG, M<sub>1</sub>dG and 8-oxo-dA during column chromatography purification.

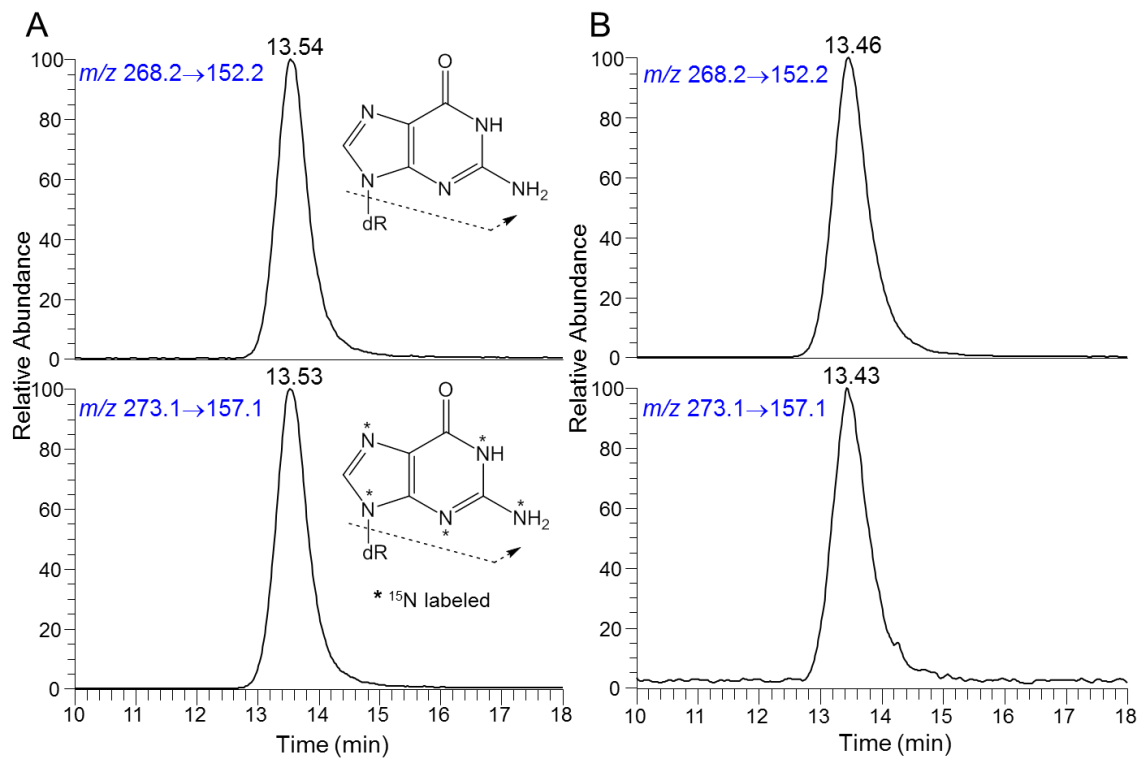

Figure S3. Typical chromatograms obtained upon analysis of dG in (A) standard solution and (B) mitochondrial DNA from one donor's retina.
